# Supplementary material for: An integrating strategy for serum metabolomics and microarray analysis to expand the understanding of diet-induced obesity
Source: Royal Society of Chemistry journal article supplement (doi:10.1039/d1ay00821h), 2021-01-01
Supplement: d1ay00821h1.pdf [file d1ay00821h1.pdf]

1  
2  
3  
4  
5  
6  
7  
8  
9  
10  
11  
12  
13  
14  
15  
16  
17  
18  
19  
20  
21  
22  
23  
24  
25  
26  
27

## Supporting Information

### **An integrating strategy for serum metabolomics and microarray analysis to expand the understanding of diet-induced obesity**

Wuping Liu<sup>1</sup>, Jingjing Xu<sup>1</sup>, Tao Dai<sup>2</sup>, Guiping Shen<sup>1,\*</sup>, Jianghua Feng<sup>1,\*</sup>

#### **Author affiliations**

<sup>1</sup> Department of Electronic Science, Fujian Provincial Key Laboratory of Plasma and Magnetic Resonance, Xiamen University, Xiamen, 361005, China

<sup>2</sup> Third Affiliated Hospital, Henan University of Science and Technology, Luoyang, 471003, China

#### **\* Corresponding Author:**

Address: Department of Electronic Science, Xiamen University, 422 Siming South Road, Siming District, Xiamen, Fujian 361005, China

Jianghua Feng, Email address: [jianghua.feng@xmu.edu.cn](mailto:jianghua.feng@xmu.edu.cn)

Guiping Shen, Email address: [gpshen@xmu.edu.cn](mailto:gpshen@xmu.edu.cn).

#### **Abbreviations**

LDL: low density lipoprotein

NAG: N-Acetylglutamate

PAG: Phenylacetylglycine

PUFA: polyunsaturated fatty acid

VLDL: very low density lipoprotein

**Table S1.** Identified metabolites from the NMR spectra of rat serum

| No. | Metabolites   | <sup>1</sup> H chemical shift,<br>ppm (multiplicity) | No. | Metabolites       | <sup>1</sup> H chemical shift,<br>ppm (multiplicity) |
|-----|---------------|------------------------------------------------------|-----|-------------------|------------------------------------------------------|
| 1   | LDL           | 0.88(br),1.27(br)                                    | 19  | Citrate           | 2.54(d),2.69(d)                                      |
| 2   | Leucine       | 0.95(t)                                              | 20  | Ketoleucine       | 2.65(d)                                              |
| 3   | Isoleucine    | 0.98(t),1.02(d)                                      | 21  | Aspartate         | 2.68(m)                                              |
| 4   | Valine        | 1.04(d)                                              | 22  | Sarcosine         | 2.74(s), 3.60(s)                                     |
| 5   | Ethanol       | 1.18(t)                                              | 23  | Creatine          | 3.03(s), 3.93(s)                                     |
| 6   | Lactate       | 1.33(d),4.12(q)                                      | 24  | Histidine         | 3.25(m)                                              |
| 7   | L-Alanine     | 1.48(d)                                              | 25  | $\alpha$ -glucose | 3.42(t),3.54(dd),3.72(t),<br>3.74(mm),5.24(d)        |
| 8   | VLDL          | 1.31(br),1.58(br)                                    | 26  | Tryptophan        | 3.21(dd), 3.49(dd)                                   |
| 9   | Lipid         | 1.78(br),2.75(br)                                    | 27  | Methylxanthine    | 3.51(s)                                              |
| 10  | Acetate       | 1.91(s)                                              | 28  | Glycine           | 3.56(s)                                              |
| 11  | NAG           | 2.04(s)                                              | 29  | PAG               | 3.69(s),3.76(d)                                      |
| 12  | Methionine    | 2.13(s),2.650(t)                                     | 30  | $\beta$ -glucose  | 3.25(dd),3.46(t),3.9(dd),<br>4.65(dd)                |
| 13  | Acetone       | 2.22(s)                                              | 31  | Glycolic acid     | 3.93 (s)                                             |
| 14  | p-Cresol      | 2.25(s)                                              | 32  | PUFA              | 5.30(br)                                             |
| 15  | Acetoacetate  | 2.30(s)                                              | 33  | Tyrosine          | 6.89(d);7.05(d)                                      |
| 16  | Pyruvate      | 2.36(s)                                              | 34  | Methylhistidine   | 7.05(s),7.82(s)                                      |
| 17  | Succinic acid | 2.390(s)                                             | 35  | Formate           | 8.45(s)                                              |
| 18  | Glutamine     | 2.14(m),2.44(m)                                      |     |                   |                                                      |

29 Multiplicity: s, singlet; d, doublet; t, triplet; q, quartet; dd, doublets; m, multiplet, br, broad peaks

31 **Table S2.** Identified potential biomarkers from the NMR spectra of rat serum and  
 32 their related parameters

| Metabolites  | $\delta(^1\text{H}$ , multiplicity, assignments)   | Correlation coefficient | VIP   | p-value | KEGG ID |
|--------------|----------------------------------------------------|-------------------------|-------|---------|---------|
| LDL          | 0.88 (br, $-\text{CH}_3$ ), 1.22-1.30 (br)         | 0.688                   | 5.037 | 0.004   | C01595  |
| Lactate      | 1.33 (d, $-\text{CH}_3$ ), 4.12 (q, $-\text{CH}$ ) | 0.538                   | 6.339 | 0.048   | C00186  |
| Alanine      | 1.48 (d, $\beta\text{-CH}_3$ )                     | 0.694                   | 3.919 | 0.015   | C00041  |
| Pyruvate     | 2.37 (s, $-\text{CH}_3$ )                          | -0.569                  | 1.021 | 0.036   | C00022  |
| Acetoacetate | 2.30 (s, $-\text{CH}_3$ )                          | -0.667                  | 1.473 | 0.016   | C00383  |
| Citrate      | 2.54 (d, $-\text{CH}_2$ )                          | -0.597                  | 1.335 | 0.026   | C00300  |
| Aspartate    | 2.68 (dd, $\beta\text{-CH}_3$ )                    | -0.567                  | 1.426 | 0.029   | C00245  |
| Sarcosine    | 2.74 (s, $-\text{CH}_3$ )                          | -0.863                  | 3.522 | 0.00021 | C00037  |
| Histidine    | 3.17-3.29 (m, $\beta\text{-CH}$ )                  | -0.661                  | 3.395 | 0.016   | C01026  |

33 s: singlet; d: doublet; q: quartet; dd: doublets; m: multiplet, br: broad peaks

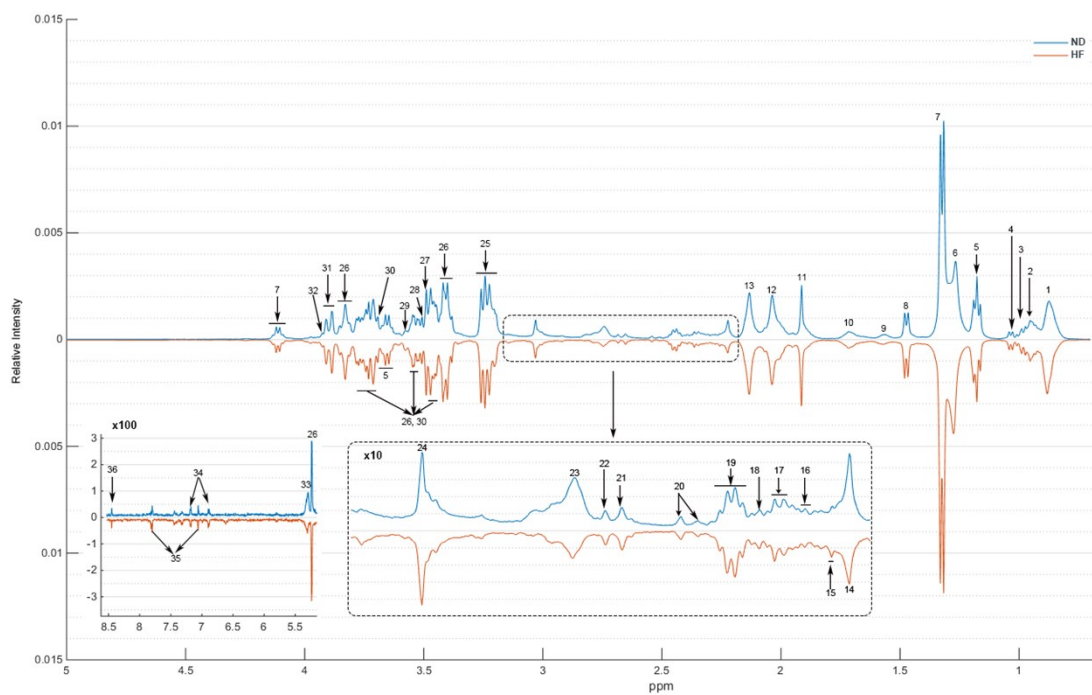

35

36 **Fig. S1.** Mean <sup>1</sup>H NMR serum spectra of ND and HF groups. (the spectral regions of 2.2-3.2 ppm  
 37 (the dashed box) and 5.0-8.6 ppm (the lower left corner) were vertically expanded 10 and 100  
 38 times compared to the remaining spectral region for the purpose of clarity. The keys for the  
 39 numbers of assigned metabolites are given in Table S1.)

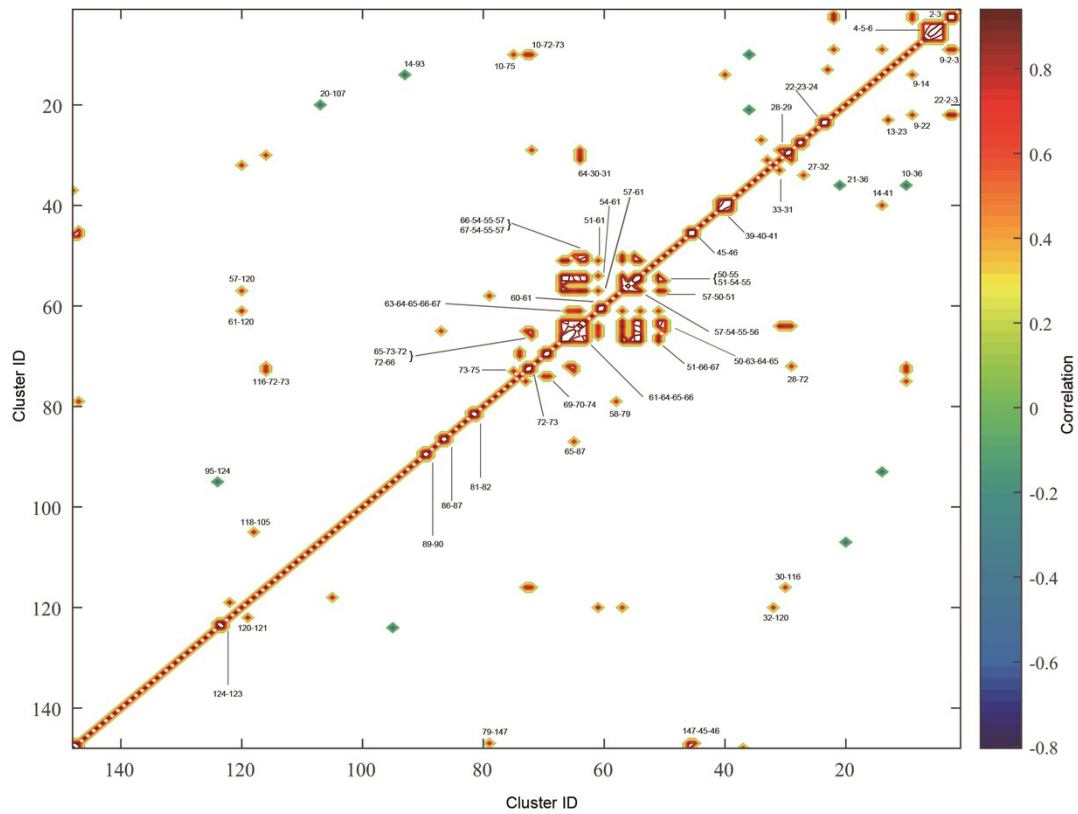

41

42 **Fig. S2.** 2D representation of an RSTOCSY pseudospectrum based on the clusters obtained by  
 43 statistical recoupling of variables on the serum dataset. Fifty-six correlation areas are identified for  
 44 a correlation threshold of 0.8 representing spin and metabolic connectivities between 2 or more  
 45 clusters (these data show in <https://github.com/liuwuping/RSTOCSY>). The degree of  
 46 correlations between clusters has been color-coded (positive correlations in red and negative  
 47 correlations in blue).
